# Supplementary material
Source: HighWire-hosted journal article supplement (https://qualitysafety.bmj.com/content/33/1/43)
Supplement: inline-supplementary-material-2 [file inline-supplementary-material-2.pdf]

## Supplementary file 2

**1. Matrix of how individual, included articles support the refinement of the initial programme theory by describing principles of academic detailing and educational outreach visiting and whether they support their relation to changes in prescribing (or not).**

Outcomes: intended change in prescribing *qualitative studies in italics*

Outcomes: equivocal / no change *qualitative studies in italics*

| Articles in chronological order                                                | Design programs to meet needs | Evidence-based approach Establish credibility | Concise educational materials | Acknowledge controversial issues. | Make practical recommendations | Hire and train clinicians | Training | Timing and location | Establish rapport | Elicit needs | Tailor EV | Interactive discussions | Repeat key messages | Elicit commitment | Provide resources | Sustain relationship |
|--------------------------------------------------------------------------------|-------------------------------|-----------------------------------------------|-------------------------------|-----------------------------------|--------------------------------|---------------------------|----------|---------------------|-------------------|--------------|-----------|-------------------------|---------------------|-------------------|-------------------|----------------------|
| Avorn and Soumerai 1983 [2] / USA                                              |                               |                                               |                               | X                                 |                                | X                         | X        | X                   |                   |              |           | X                       |                     |                   | X                 | X                    |
| Soumerai and Avorn 1987 [75] / USA                                             |                               |                                               |                               |                                   |                                |                           |          |                     |                   | X            |           |                         |                     |                   |                   | X                    |
| Yeo, de Burgh et al. 1994 [68] / Australia                                     |                               |                                               | X                             |                                   |                                | X                         | X        |                     | X                 | X            |           |                         |                     | X                 | X                 |                      |
| de Burgh, Mant et al. 1995 [66] / Australia                                    |                               |                                               | X                             |                                   | X                              | X                         | X        |                     |                   |              |           |                         |                     |                   |                   |                      |
| Alvarez, Larmour et al. 2001 [49] / Australia                                  | X                             |                                               | X                             |                                   |                                |                           | X        |                     |                   |              |           |                         |                     |                   | X                 |                      |
| Watson, Gunnell et al. 2001 [73] / UK                                          |                               | X                                             |                               |                                   |                                | X                         | X        |                     |                   |              | X         |                         |                     |                   |                   | X                    |
| van Eijk, Avorn et al. 2001, van Eijk, Belitser et al. 2002 [69] / Netherlands |                               |                                               | X                             |                                   |                                |                           |          |                     |                   |              | X         |                         | X                   |                   |                   | X                    |
| Freemantle, Eccles et al. 1999 [65], Freemantle, Nazareth et al. 2002 [71],    |                               | X                                             | X                             |                                   | X                              | X                         | X        |                     | X                 |              | X         |                         |                     |                   |                   |                      |

|                                                                                                                 |   |   |   |   |   |   |   |   |   |   |   |   |   |   |   |   |   |
|-----------------------------------------------------------------------------------------------------------------|---|---|---|---|---|---|---|---|---|---|---|---|---|---|---|---|---|
| Nazareth, Freemantle et al. 2002 [63] / UK                                                                      |   |   |   |   |   |   |   |   |   |   |   |   |   |   |   |   |   |
| Fretheim, Oxman et al. 2003 [42], Fretheim, Aaserud et al. 2006 [72] / Norway                                   | X |   |   |   |   | X | X |   |   |   |   |   |   |   |   |   | X |
| Habraken, Janssens et al. 2003 [60] / Belgium                                                                   |   | X | X |   |   | X | X | X |   |   |   |   | X |   |   | X |   |
| McDonald, Winkle et al. 2003 [62] / Australia                                                                   |   | X |   |   |   |   |   |   |   |   |   |   |   |   |   |   | X |
| Coenen, Van Royen et al. 2004 [39] / Belgium                                                                    | X | X | X |   |   | X | X |   |   |   | X | X | X | X |   |   |   |
| <i>Janssens, De Meyere et al. 2005 [56] / Belgium</i>                                                           |   | X |   |   |   |   |   |   |   |   |   |   | X |   |   |   |   |
| Simon, Majumdar et al. 2005 [48], Simon, Rodriguez et al. 2007 [54] / USA                                       | X | X | X | X |   |   | X | X |   |   | X |   | X | X |   |   |   |
| <i>Allen, Ferrier et al. 2007 [43] / Canada</i>                                                                 | X | X | X |   |   | X | X |   | X |   |   |   |   |   |   |   | X |
| <i>May, Simpson et al. 2009 [52] / USA</i>                                                                      |   | X | X |   |   |   |   | X | X | X | X | X |   | X |   | X |   |
| Patel and Afghan 2010 [40] / UK                                                                                 | X | X | X |   |   |   | X | X |   |   |   |   |   | X | X | X | X |
| <i>Chhina, Hall et al. 2013 [24], Maltais, Schmidt et al. 2014 [46], Chhina, Hall et al. 2017 [38] / Canada</i> | X | X | X | X | X | X |   | X |   |   |   | X |   |   | X |   |   |
| Carr, Patel et al. 2015 [47] / UK                                                                               | X | X | X |   |   | X | X | X |   | X | X | X |   |   |   | X | X |
| Behar, Rowe et al. 2017 [61] / USA                                                                              | X | X |   |   |   | X |   | X |   |   |   | X |   |   | X |   |   |

|                                                                                                              |   |   |   |   |   |   |   |   |   |   |   |   |   |   |   |   |
|--------------------------------------------------------------------------------------------------------------|---|---|---|---|---|---|---|---|---|---|---|---|---|---|---|---|
| <i>Morrow, Tattelman et al. 2016 [55] / USA</i>                                                              |   | X |   |   |   | X | X |   | X |   | X |   |   | X |   | X |
| Bounthavong, Suh et al. 2020 [70], Gale, Wu et al. 2019 [67] / USA                                           |   | X | X |   |   | X |   |   |   |   |   |   |   |   |   |   |
| <i>Vasudev, Lamoure et al. 2017 / Canada</i>                                                                 | X | X | X |   |   | X | X |   |   |   |   |   |   | X | X | X |
| <i>Anthierens, Verhoeven et al. 2017 [12], Bruyndonckx, Verhoeven et al. 2018 [57] / Belgium</i>             | X | X | X | X | X | X | X | X | X | X | X | X |   | X |   |   |
| Midboe, Wu et al. 2018 [64] / USA                                                                            |   | X |   |   | X |   | X |   |   | X | X |   |   | X |   |   |
| <i>Pinto, Heleno et al. 2018 [53] / USA</i>                                                                  | X |   | X | X |   | X | X | X |   | X | X |   |   | X |   | X |
| Riordan, Hurley et al. 2019 [50] / Ireland                                                                   | X |   | X |   |   |   | X | X | X |   | X |   |   |   |   |   |
| Dyrkorn, Langaas et al. 2019 [11] / Norway                                                                   | X | X | X |   |   | X | X | X |   |   |   | X | X |   | X |   |
| <i>Carvalho Borin, Kakehasi et al. 2020 [45] / Brazil</i>                                                    | X | X | X |   |   | X |   |   |   | X | X |   |   |   |   |   |
| Saffore, Tilton et al. 2020 [58], Saffore, Pickard et al. 2020 [59], Saffore, Pickard et al. 2021 [76] / USA |   | X |   |   |   | X | X |   |   | X |   | X | X | X | X |   |
| <i>Smart, Mandava et al. 2021 [44] / USA</i>                                                                 | X |   | X |   |   | X | X |   |   |   | X | X |   |   |   | X |
| Ragan, Aikens et al. 2021 [74] / USA                                                                         |   |   |   |   |   | X |   |   |   | X | X |   |   |   |   | X |

## 2. Timeline of main visiting topics described in included articles

| 1983                                        | 1995        | 2000-2005                                                                                    | 2006-2010                                      | 2011-2015                  | 2016-2022                                                                                      |
|---------------------------------------------|-------------|----------------------------------------------------------------------------------------------|------------------------------------------------|----------------------------|------------------------------------------------------------------------------------------------|
| Propoxyphene<br>Vasodilators<br>Antibiotics | <b>BZD*</b> | <b>NSAIDs</b><br>Antibiotics<br>Antihypertensives<br><b>Antidepressants</b><br>Antiplatelets | Analgesics<br>Antidiabetics<br>Antidepressants | Antihypertensives<br>DOACs | <b>Opioids</b><br><b>Naloxone</b><br>NSAIDs<br>BZD<br>bDMARDs<br>Antibiotics<br>Antipsychotics |

BZD: benzodiazepines

NSAIDs: non-steroidal anti-inflammatory drugs

DOAC: direct oral anticoagulant

bDMARD: biologic disease modifying antirheumatic drug

\* in bold EV topics covered in multiple studies
