# Supplementary material
Source: HighWire-hosted journal article supplement (https://qualitysafety.bmj.com/content/33/1/43)
Supplement: inline-supplementary-material-5 [file inline-supplementary-material-5.pdf]

**Supplementary file 5****The Conversational Framework for Learning and Educational Visiting**

Adapted from Diana Laurillard

From <https://www.futurelearn.com/info/courses/blended-and-online-learning-design/0/steps/191671> (accessed 4 January 2023)

In the upper left quadrant of the diagram, the dialogue between the ‘learner/teacher’ clinician and ‘teacher/learner’ visitor creates opportunities to construct new concepts (for EV these could centre on evidence, data, clinical and prescribing practice, uncertainties and controversies).

In the lower left quadrant, clinician and visitor share and model practice, again modulating and generating shared understanding through dialogue and feedback, to achieve the integration of new concepts and practices into routine practice.

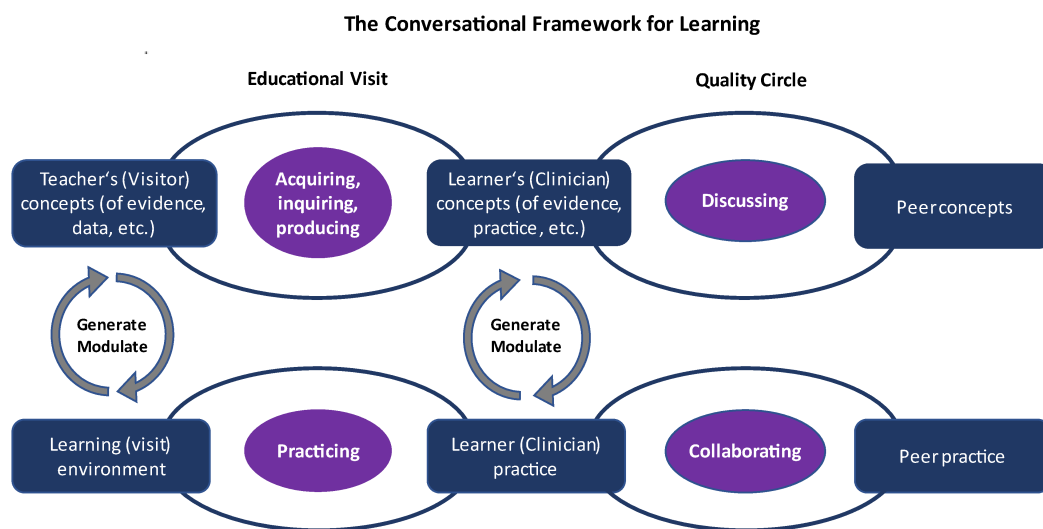

Similar processes take place in Quality Circles, although discussions in the upper right quadrant may be less personalised to an individual clinician's needs compared to EV. At the same time, learning from peer practice through collaboration, in the lower right quadrant, may be favoured by some clinicians.
