# Supplementary material
Source: HighWire-hosted journal article supplement (https://qualitysafety.bmj.com/content/33/1/43)

## Supplementary file 3

PRISMA diagram

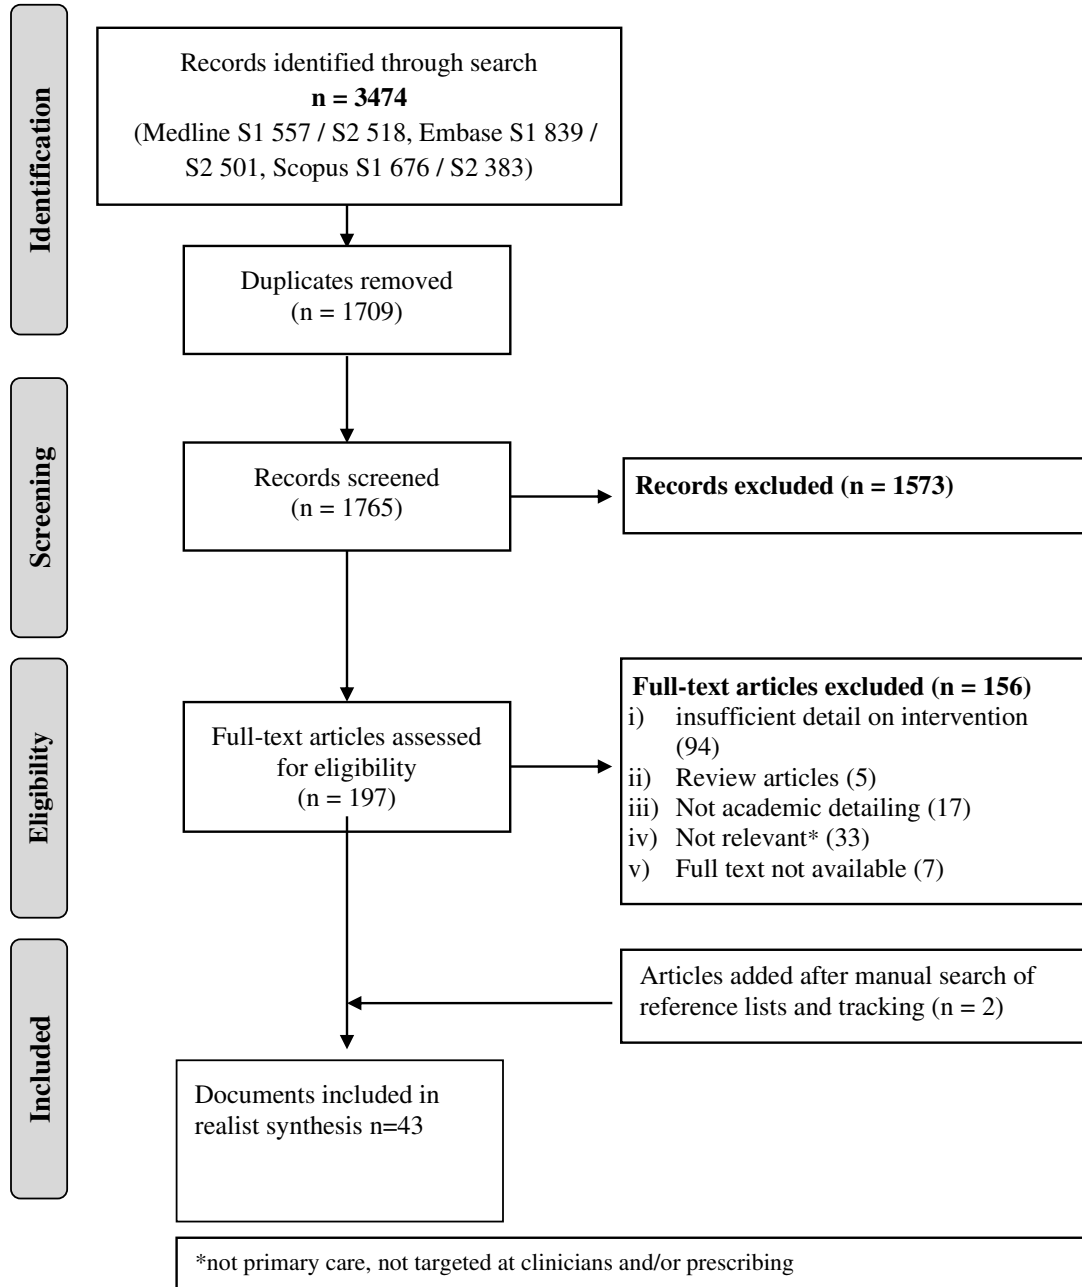

Supplement: inline-supplementary-material-3 [file inline-supplementary-material-3.pdf]
